# Supplementary material for: Trichuris trichiura infection and its relation to environmental factors in Mbeya region, Tanzania: A cross-sectional, population-based study
Source: PLoS One. 2017 Apr 6;12(4):e0175137. doi: 10.1371/journal.pone.0175137 (PMC5383155; doi:10.1371/journal.pone.0175137)
Supplement: S2 Table — Results of multivariable Poisson regressions adjusted for household clustering using robust variance estimates for Kyela (N = 912). (DOCX) [file pone.0175137.s003.docx]

**Table S2: Influence of subsite variable on the final models M1 and M2.** Results of multivariable Poisson regressions adjusted for household clustering using robust variance estimates for Kyela (N=912).

| Kyela both sites |  |  | Multivariable M1 with subsitea) | | | Multivariable M2 with subsiteb) | | |
| --- | --- | --- | --- | --- | --- | --- | --- | --- |
| Covariate | N | % pos. | PR | 95% CI | p-value | PR | 95% CI | p-value |
| **Age** (years) |  |  |  |  |  |  |  |  |
| 0-5 | 106 | 19.8 | 1.00 | - | - | 1.00 | - | - |
| 5-20 | 422 | 35.8 | 2.02 | 1.41 – 2.89 | <0.001 | 2.02 | 1.42 – 2.90 | <0.001 |
| 20 and older | 384 | 18.5 | 0.97 | 0.64 – 1.47 | 0.883 | 0.97 | 0.65 – 1.46 | 0.892 |
| **Worm treatment last year** |  |  |  |  |  |  |  |  |
| No | 565 | 26.9 | 1.00 | - | - | 1.00 | - | - |
| Yes | 37 | 37.8 | 1.65 | 1.20 – 2.27 | 0.002 | 1.53 | 1.11 – 2.12 | 0.010 |
| No information | 319 | 24.5 | 0.96 | 0.65 – 1.34 | 0.830 | 0.88 | 0.65 – 1.21 | 0.436 |
| **Subsite** |  |  |  |  |  |  |  |  |
| A | 295 | 2.7 | 1.00 | - | - | 1.00 | - | - |
| B | 617 | 38.1 | 2.38 | 0.68 – 8.35 | 0.174 | 0.33 | 0.07 – 1.66 | 0.179 |
| **Mean annual EVI** (per 0.1 units) |  |  | 1.84 | 1.08 – 3.15 | 0.026 |  |  |  |
| **Mean annual rainfall** (per 100 mm) |  |  | 0.62 | 0.48 – 0.80 | <0.001 |  |  |  |
| **Elevation** (per m) |  |  |  |  |  | 0.87 | 0.82 – 0.92 | <0.001 |
| **FP1 polynomial transformed slope**c) |  |  |  |  |  | 0.23 | 0.11 – 0.48 | <0.001 |
| **Akaike information criterion AIC** |  |  |  | 954 |  |  | 938 |  |
| **Bayesian information criterion BIC** |  |  |  | 993 |  |  | 977 |  |
| N = number of observations in stratum, % pos. = percent *T. trichiura* infected in stratum, PR = prevalence ratio, 95% CI = 95% confidence interval. a) Multivariable model including only age, previous worm treatment, subsite, mean annual EVI and rainfall but not elevation, which was excluded because of collinearity with rainfall. b) Multivariable model including only age, previous worm treatment, subsite, elevation and slope of the terrain but not rainfall which was excluded because of collinearity with elevation. EVI = enhanced vegetation index. c) FP1 fractional polynomial transformation with one degree and power of p=-1: β(slope)p. | | | | | | | | |
