# Supplementary material for: Trichuris trichiura infection and its relation to environmental factors in Mbeya region, Tanzania: A cross-sectional, population-based study
Source: PLoS One. 2017 Apr 6;12(4):e0175137. doi: 10.1371/journal.pone.0175137 (PMC5383155; doi:10.1371/journal.pone.0175137)
Supplement: S3 Table — Results of multivariable Poisson regressions adjusted for household clustering using robust variance estimates for Kyela B (N = 617). (DOCX) [file pone.0175137.s004.docx]

**Table S3: Final models including only participant data from subsite Kyela B.** Results of multivariable Poisson regressions adjusted for household clustering using robust variance estimates for Kyela B (N=617).

| Subsite Kyela B |  |  | Multivariable M1a) | | | Multivariable M2b) | | |
| --- | --- | --- | --- | --- | --- | --- | --- | --- |
| Covariate | N | % pos. | PR | 95% CI | p-value | PR | 95% CI | p-value |
| **Age** (years) |  |  |  |  |  |  |  |  |
| 0-5 | 74 | 28.4 | 1.00 | - | - | 1.00 | - | - |
| 5-20 | 271 | 53.5 | 1.97 | 1.38 – 2.81 | <0.001 | 2.04 | 1.42 – 2.92 | <0.001 |
| 20 and older | 272 | 25.4 | 0.95 | 0.62 – 1.44 | 0.796 | 0.97 | 0.64 – 1.47 | 0.901 |
| **Worm treatment last year** |  |  |  |  |  |  |  |  |
| No | 374 | 38.5 | 1.00 | - | - | 1.00 | - | - |
| Yes | 25 | 56.0 | 1.74 | 1.27 – 2.38 | 0.001 | 1.61 | 1.17 – 2.22 | 0.004 |
| No information | 218 | 35.3 | 1.03 | 0.74 – 1.42 | 0.876 | 0.96 | 0.71 – 1.31 | 0.818 |
| **Mean annual EVI** (per 0.1 units) |  |  | 1.74 | 1.03 – 2.93 | 0.038 |  |  |  |
| **Mean annual rainfall** (per 100 mm) |  |  | 0.59 | 0.45 – 0.77 | <0.001 |  |  |  |
| **Elevation** (per m) |  |  |  |  |  | 0.86 | 0.81 – 0.91 | <0.001 |
| **FP1 polynomial transformed slope**c) |  |  |  |  |  | 0.32 | 0.16 – 0.61 | 0.001 |
| **Akaike information criterion AIC** |  |  |  | 880 |  |  | 868 |  |
| **Bayesian information criterion BIC** |  |  |  | 911 |  |  | 899 |  |
| N = number of observations in stratum, % pos. = percent *T. trichiura* infected in stratum, PR = prevalence ratio, 95% CI = 95% confidence interval. a) Multivariable model including only age, previous worm treatment, mean annual EVI and rainfall. b) Multivariable model including only age, previous worm treatment, elevation and slope of the terrain. EVI = enhanced vegetation index. c) FP1 fractional polynomial transformation with one degree and power of p=-1: β(slope)p. | | | | | | | | |

Note: The models M1 and M2 cannot be estimated for Kyela A, since there are no infected participants in the reference age category of 0 to 5 years.
